# Supplementary material
Source: Royal Society of Chemistry journal article supplement (https://www.rsc.org/suppdata/books/178801/9781788018623/bk9781788018623-sponsors.pdf)
Supplement: Supplementary file 1 [file bk9781788018623-sponsors.pdf]

Supplementary information for  
*Conference on Drug Design and Discovery Technologies*  
© The Royal Society of Chemistry 2020

# Sponsors of the Conference

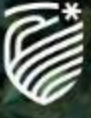

**RAMAIAH**  
Indic Specialty Ayurveda  
RESTORATION HOSPITAL

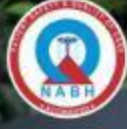

ರಾಮಯ್ಯ  
ಇಂಡಿಕ್ ಸ್ಪೆಶಾಲಿಟಿ ಆಯುರ್ವೇದ  
ರೆಸ್ಟೋರೇಷನ್ ಆಸ್ಪತ್ರೆ

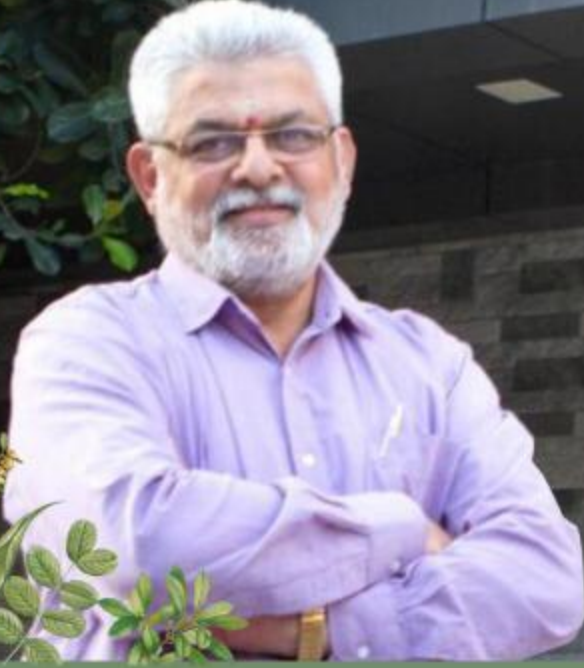

Under the Guidance of Renowned Ayurveda Physician

**AYURVEDACHARYA**  
**Prof Dr G G Gangadharan**

FAIP (USA), PhD, MoM (McGill, Canada)

## CLINICAL SERVICES

### † KAYACHIKITSA

Respiratory allergies, Gastro-intestinal problems, Lifestyle diseases, Psoriasis

### † STREE ROGA & PRASUTI TANTRA

DUB, PCOS, Uterine fibroid, Cervicitis, Vaginitis, Hypothyroidism, Obesity, Post-natal care, Ante natal care

### † SHALAKYA TANTRA

Refractive errors, Glaucoma, Retinitis Pigmentosa, Retinal degeneration, Diabetic retinopathy, Optic neuropathy, Immature stages of cataract

### † SWASTHAVRUTHA

Diabetes, Obesity and Chronic metabolic disorders, Dietary management with lifestyle advice, Yoga and Meditation

### † JARACHIKITSA

Paralysis, Sciatica, Parkinson's disease and Ataxias, Arthritis, Spondylitis

### † KAUMARABHRITHYA

Diseases in children – Musculoskeletal, Respiratory, Skin diseases, Juvenile diabetes and Delayed developmental milestones

### † SHALYA CHIKITSA

Piles, Fistula - Ksharasutra

### † MARMA CHIKITSA

Spinal disorders like - Spondylitis, Spondylosis & Spondylolisthesis, IVDP, Degenerative disc disease, Frozen shoulder, Tennis elbow, Carpal tunnel syndrome, Scoliosis, Lordosis

### FACILITIES AVAILABLE

YOGA | PHARMACY

24 X 7 IN PATIENT FACILITY – SUITE,

DELUXE, PRIVATE, SEMIPRIVATE ROOM ACCOMMODATIONS

(Memorial hospital attached for emergency services)

### FRANCHISES INVITED IN INDIA AND ABROAD

BRANCH AT YELHANKA - BANGALORE

FIRST FRANCHISE AT JP NAGAR - BANGALORE ,

JOINT VENTURE AT PENANG - MALAYSIA

**Ramaiah Indic Specialty Ayurveda Restoration Hospital**

New BEL Road, MS Ramaiah Nagar, MSRIT Post, Mathikere, Bangalore – 560 064

+91 80 2218 3456, +91 9632128544, 8099959595

✉ [msricaim@gmail.com](mailto:msricaim@gmail.com) 🌐 [www.ramaiahayurveda.com](http://www.ramaiahayurveda.com)

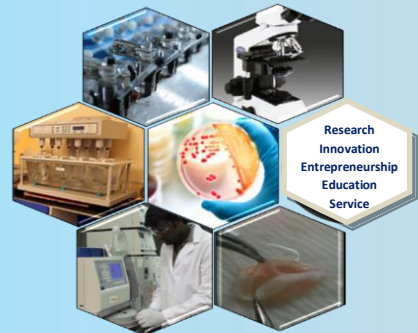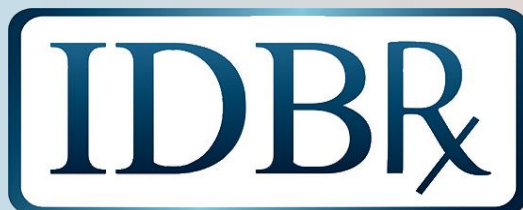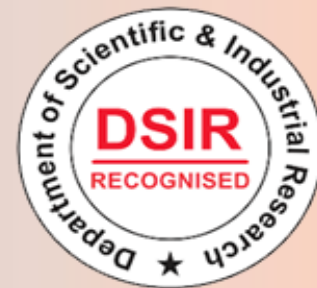

**Innovative Research for Unmet Medical Needs**

# INSTITUTE FOR DRUG DELIVERY AND BIOMEDICAL RESEARCH

**Our Vision: To foster innovative research in the area of Drug delivery and Biomedical research and to discover Affordable health solutions to address Unmet medical needs**

**Institute for Drug Delivery and Biomedical Research (IDBR)** is a non-profit research organization established in the year of 2013. IDBR was formed by highly motivated and renowned scientists, to conduct interdisciplinary and advanced research on innovative drug delivery and novel treatment methods. IDBR strongly intends to bridge the gap between basic and clinical sciences. IDBR aims to discover affordable healthcare solutions to address unmet medical needs and develop platform technologies that would transform the health of large section of the society. One of the major objectives of IDBR is also to provide guidance and infrastructural facilities to support active research in Academia and Industry. The research areas focused have a bench to bedside approach and are intended to improve the quality of life of patients suffering from chronic disorders.

### RESEARCH GRANTS AND FUNDING

- Multiple Biotechnology Ignition grants from Department of Biotechnology, Govt. of India.
- Research grant from Baba Atomic Research Centre, Govt. of India.
- Collaboration with global Pharmaceutical Industry.
- Collaboration with Premier Universities across the world.
- Technology transfer, Out-licensing and Commercialization.

### BIOMEDICAL DEVICES DEVELOPED BY IDBR TEAM

1. Iontophoresis patch 2. Iron Deficiency Patch 3. Programmed drug delivery 4. Dermal Microneedles 5. Sublingual Microserts

### RESEARCH AREAS AND CAPABILITIES

|                                                                                                                                                                                                                                                                                         |                                                                                                                                                                                                                                                                   |
|-----------------------------------------------------------------------------------------------------------------------------------------------------------------------------------------------------------------------------------------------------------------------------------------|-------------------------------------------------------------------------------------------------------------------------------------------------------------------------------------------------------------------------------------------------------------------|
| <ul style="list-style-type: none"> <li>• Modulation of Permeability of Biological Barriers</li> <li>• Biophysical Approaches for Treating Health Disorders</li> <li>• Skin Research</li> <li>• Brain Research</li> <li>• Lipid Based Drug Delivery</li> <li>• Nanotechnology</li> </ul> | <ul style="list-style-type: none"> <li>• Drug Delivery Systems to Modulate ADME of Therapeutic Agents</li> <li>• Physical Chemistry of Therapeutic Agents</li> <li>• Sensory Research</li> <li>• Microbiome and Health</li> <li>• Biosimilars Research</li> </ul> |
|-----------------------------------------------------------------------------------------------------------------------------------------------------------------------------------------------------------------------------------------------------------------------------------------|-------------------------------------------------------------------------------------------------------------------------------------------------------------------------------------------------------------------------------------------------------------------|

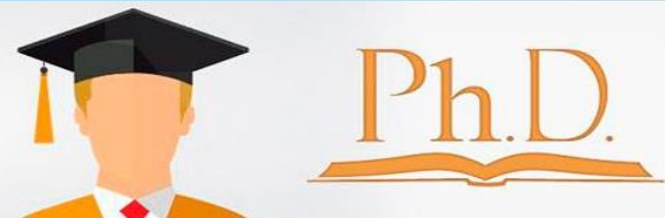

**IDBR, in collaboration with Dayananda Sagar University (DSU) Bengaluru, offers PhD program in Life Sciences and Pharmaceutical Sciences.**

# Pharm. Chemistry Pharmacology Pharmaceutics

solutions to innovate...  
www.zastrain.com

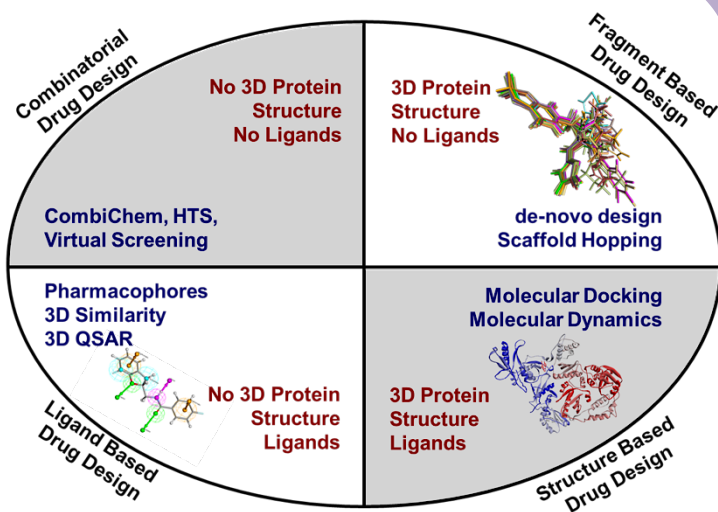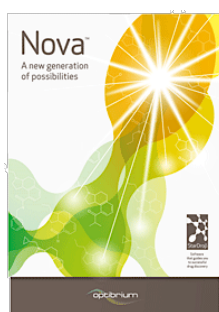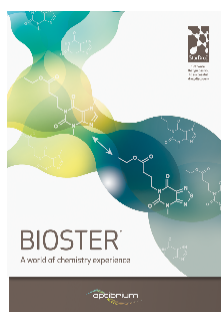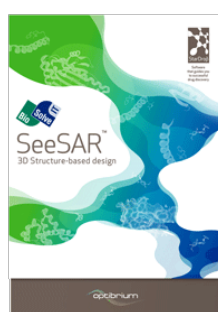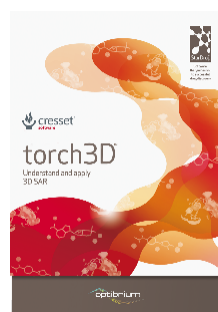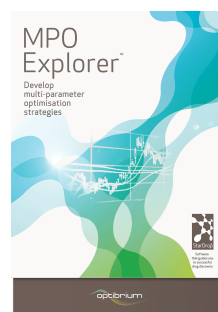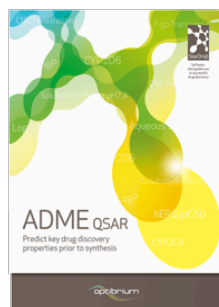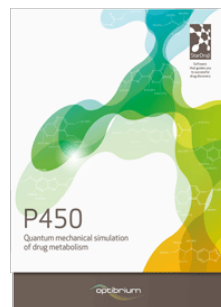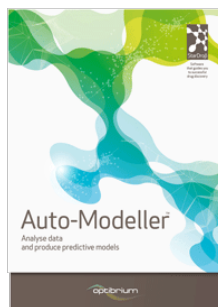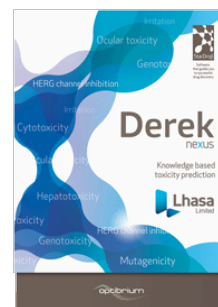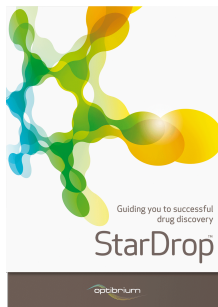

## Zastra Innovations Pvt. Ltd.

837, II Floor, 3<sup>rd</sup> Cross Rd.,  
HRBR 1<sup>st</sup> Block, Kalyan Nagar,  
Bengaluru, Karnataka

[www.zastrain.com](http://www.zastrain.com)

Currently used by academic, research labs and industrial researchers in all areas of medicinal chemistry, pharmaceutical chemistry, pharmacology, pharmacology, drug chemistry and organic chemists.

Contact us to understand how the software could help tackle your research questions,  
Or discuss your research challenges?

Publications, Scientific presentations and Case Studies at <http://bit.ly/optitut>

Contact us:

[info@zastrain.com](mailto:info@zastrain.com)

080-41104821

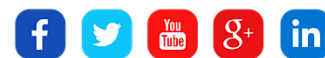

Director: Dr. Girinath G. Pillai, PhD
